# Supplementary material
Source: publisher site journal article supplement (https://www.spandidos-publications.com/7729/downloadSupplementary)
Supplement: Supplementary file 1 [file downloadSupplementary]

Table SI. Hormonal receptor testing and immunohistochemistry testing procedure details.

|                                                        |                                                                                                                                                                                                                                                                                                                                                                                                                                                                                                                                                                                                                                                                                                                                                                                                                                                                                                                                                                                                                                                                                                                                                                                                                                                                                                                                                                                                                                                |
|--------------------------------------------------------|------------------------------------------------------------------------------------------------------------------------------------------------------------------------------------------------------------------------------------------------------------------------------------------------------------------------------------------------------------------------------------------------------------------------------------------------------------------------------------------------------------------------------------------------------------------------------------------------------------------------------------------------------------------------------------------------------------------------------------------------------------------------------------------------------------------------------------------------------------------------------------------------------------------------------------------------------------------------------------------------------------------------------------------------------------------------------------------------------------------------------------------------------------------------------------------------------------------------------------------------------------------------------------------------------------------------------------------------------------------------------------------------------------------------------------------------|
| <p>The details of immunohistochemistry procedures.</p> | <p>Immunohistochemical staining was performed on formalin-fixed, paraffin-embedded tissue sections using an automated Ventana BenchMark platform (Ventana Medical Systems, Roche, Tucson, AZ, USA). All specimens were fixed in 10% neutral buffered formalin at room temperature for 6-48 h. Heat-induced epitope retrieval was performed using Cell Conditioning 1 solution under the following conditions: 64 min at 95°C for ER (SP1; cat. no. 790-4324), PR (1E2; cat. no. 790-2223) and cytokeratin 8/18 (SP141; cat. no. 760-4344); 36 min at 95°C for HER2/neu (4B5; cat. no. 790-2991) and S100 (polyclonal; cat. no. 760-2523); 64 min at 90°C for p63 (4A4; cat. no. 790-4509), c-Kit/CD117 (polyclonal; cat. no. 790-2951) and Ki-67 (30-9; cat. no. 790-4286); and 52 min at 95°C for Chromogranin A (LK2H10; cat. no. 760-2519) (all antibodies from Ventana, Roche). The immunostain antibodies were supplied in a ready-to-use formulation and processed on a fully automated immunostainer. As the antibodies were pre-diluted by the manufacturer, neither primary nor secondary antibody dilution was applicable. Primary antibody incubation was performed at 36°C for 32 min (ER, PR, HER2/neu, Chromogranin A and cytokeratin 8/18), 40 min (p63, c-Kit and Ki-67) or 24 min (S100). Detection was carried out using the Ventana ultraView Universal DAB detection kit according to the manufacturer's instructions.</p> |
|--------------------------------------------------------|------------------------------------------------------------------------------------------------------------------------------------------------------------------------------------------------------------------------------------------------------------------------------------------------------------------------------------------------------------------------------------------------------------------------------------------------------------------------------------------------------------------------------------------------------------------------------------------------------------------------------------------------------------------------------------------------------------------------------------------------------------------------------------------------------------------------------------------------------------------------------------------------------------------------------------------------------------------------------------------------------------------------------------------------------------------------------------------------------------------------------------------------------------------------------------------------------------------------------------------------------------------------------------------------------------------------------------------------------------------------------------------------------------------------------------------------|
